# Supplementary material for: Multi-approach metabolomics analysis and artificial simplified phytocomplexes reveal cultivar-dependent synergy between polyphenols and ascorbic acid in fruits of the sweet cherry (Prunus avium L.)
Source: PLoS One. 2017 Jul 21;12(7):e0180889. doi: 10.1371/journal.pone.0180889 (PMC5521804; doi:10.1371/journal.pone.0180889)
Supplement: S2 Table — The precise quantity (mg/ml) of each specific metabolite is shown representing the Sandra Tardiva, Sandra and Grace Star extracts. (XLS) [file pone.0180889.s003.xls]

## Sheet: Foglio1
ASP composition, mg/ml	Sandra Tardiva	Sandra	Grace Star
Neochlorogenic acid	0.531	0.282	0.249
Chlorogenic acid	0.028	0.016	0.0237
Quercetin-O-rutinoside	0.062	0.022	0.0138
Quercetin-3-O-glucoside	0.012	0.004	0
Cyanidin-3-O-rutinoside	0.97432	0.376	0.24067
Cyanidin-3-O-glucoside	0.15166	0.077	0.01132
L-ascorbic acid	0.0459642	0.104	0.069954
